# Supplementary material
Source: HighWire-hosted journal article supplement (https://jitc.bmj.com/content/11/6/e006678)
Supplement: inline-supplementary-material-1 [file inline-supplementary-material-1.pdf]

## Supplemental Figure

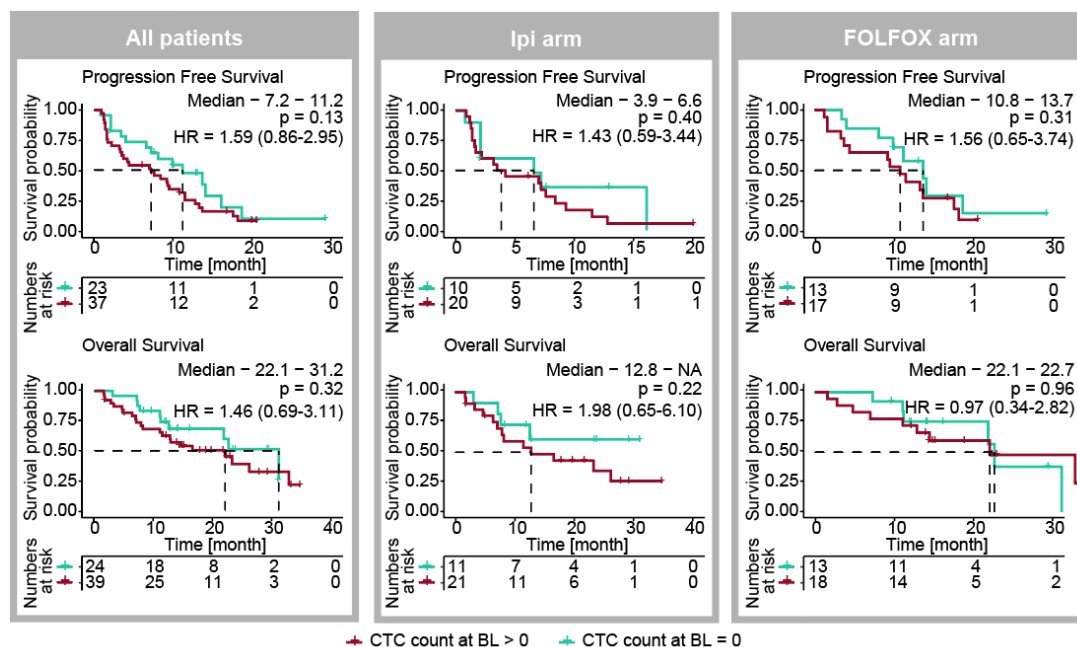

**Supplemental Figure S1: Survival probability in relation to the number of circulating tumor cells (CTC) at baseline.** Kaplan-Meier plots of progression-free survival (PFS) and overall survival (OS) of all patients (left row), Ipi arm (middle row) and FOLFOX arm (right row). Patients with CTC counts > 0 are grouped versus patients with CTC counts = 0 before initiation of treatment. The p-values were calculated using log-rank test. Median survival is given in month. HR = hazard ratio of cox regression including 95% confidence intervals in brackets.
